# Supplementary material for: A microbial fuel cell configured for the remediation of recalcitrant pollutants in soil environment
Source: Royal Society of Chemistry journal article supplement (doi:10.1039/c9ra06957g), 2019-01-01
Supplement: c9ra06957g1.pdf [file c9ra06957g1.pdf]

*Supplementary Information*

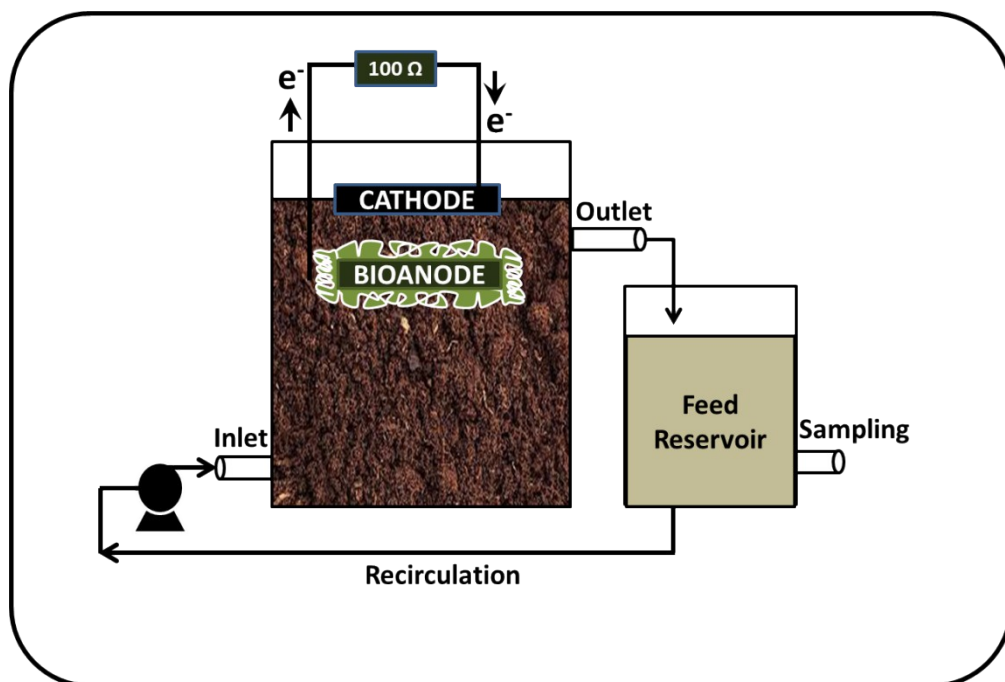

**Fig S1:** Schematic presentation of soil based microbial fuel cell (MFC) that used for bioelectro-remediation of petroleum hydrocarbons and other pollutants from the soil environment and bioelectricity generation.

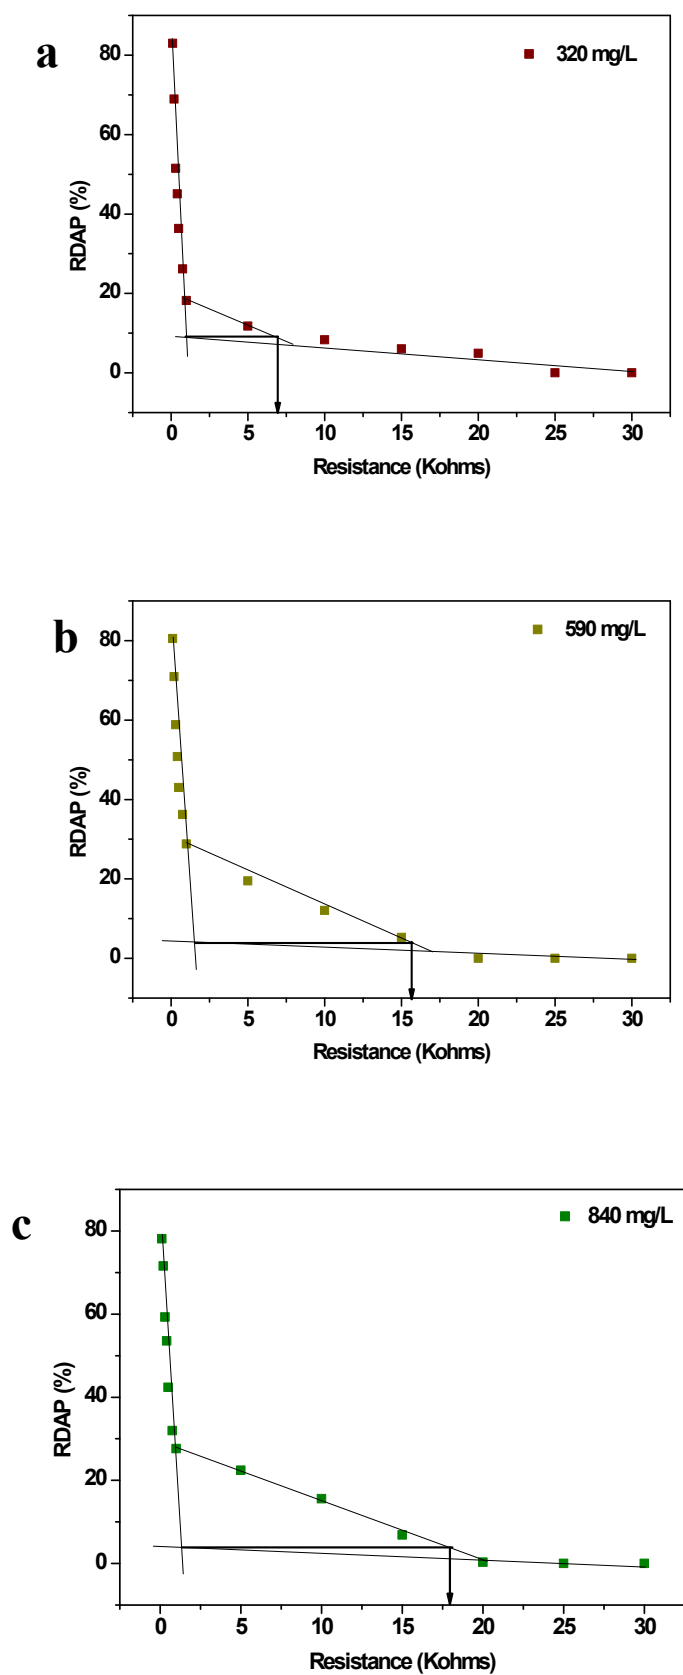

**Fig S2:** Relative decrease in anodic potential (RDAP) analysed for three different TPH loading conditions studied for soil MFC (a – 320 mg TPH/L; b – 590 mg TPH/L; c – 840 mg TPH/L)

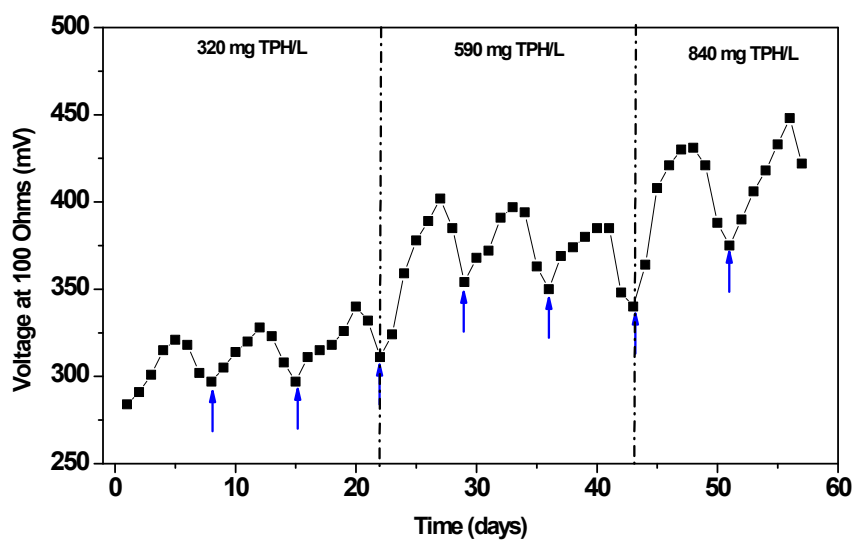

**Fig S3:** Time versus voltage representation using three different loading concentrations of TPH during MFC operation
